# Supplementary material
Source: publisher site journal article supplement (https://www.spandidos-publications.com/8627/downloadSupplementary)
Supplement: Supplementary file 1 [file downloadSupplementary]

## Sheet: Sheet1
Table S1. Patient Characteristics
		ADRB1			ADRB2
		Expression	High Expression	P	Expression	High Expression	P
Number (%)		6 (17.1)	29 (82.9)		7 (20.0)	28 (80.0)
cT (%)	1a	0 (0.0)	3 (10.3)	0.628	0 (0.0)	3 (10.7)	0.645
	1b	2 (33.3)	9 (31.0)		3 (42.9)	8 (28.6)
	2a	1 (16.7)	6 (20.7)		1 (14.3)	6 (21.4)
	2b	0 (0.0)	2 (6.9)		1 (14.3)	1 (3.6)
	3a	1 (16.7)	7 (24.1)		1 (14.3)	7 (25.0)
	3b	1 (16.7)	1 (3.4)		1 (14.3)	1 (3.6)
	4	1 (16.7)	1 (3.4)		0 (0.0)	2 (7.1)
cN (%)	0	4 (66.7)	22 (75.9)	0.757	6 (85.7)	20 (71.4)	1
	1	1 (16.7)	5 (17.2)		1 (14.3)	5 (17.9)
	2	1 (16.7)	2 (6.9)		0 (0.0)	3 (10.7)
WHO grade (%)	1	0 (0.0)	1 (3.4)	0.462	1 (14.3)	0 (0.0)	0.194
	2	1 (16.7)	11 (37.9)		2 (28.6)	10 (35.7)
	3	3 (50.0)	13 (44.8)		2 (28.6)	14 (50.0)
	4	2 (33.3)	4 (13.8)		2 (28.6)	4 (14.3)
